# Supplementary material for: CT‑based radiomics of bowel wall at baseline predicts the efficacy of Ustekinumab at week 16 in patients with Crohn’s disease
Source: Research Square preprint supplement (doi:10.21203/rs.3.rs-7441161/v1), 2025-09-03

**Supplementary Material**

## Supplementary Material 1: CT examinations

All participants were required to fast for a minimum of six hours prior to undergoing computed tomography enterography (CTE). An oral administration of 1500–2000 mL of 2.5% mannitol solution was provided 45–60 minutes before image acquisition to ensure adequate distension of the gastrointestinal tract. To mitigate gastrointestinal peristalsis, a 10 mg intramuscular injection of racemic anisodamine hydrochloride was administered 10–15 minutes prior to the CTE examination. Following initial imaging, non-ionic contrast media (Ultravist 370; Schering, Berlin, Germany) was administered intravenously at a dosage of 2 mL per kilogram at a rate of 3.5 mL/s via a dual-head power injector, followed by an immediate saline flush. All patients underwent both arterial phase and venous phase imaging, initiated 45 seconds and 70 seconds post- injection, respectively. CT examinations were conducted in a supine position during breath-holding, encompassing the area from the dome of the liver to the symphysis pubis. The CT scanner utilized was the Aquilion One (Canon Medical System) or Discovery CT 750（GE HealthCare）, with the following scan parameters: tube voltage at 120 kVp, automatic tube current (mA), pitch of 8.13, slice thickness of 1 mm, and a reconstruction interval of 1 mm. Adaptive iterative dose reduction technology was employed to minimize radiation exposure. The CT image acquisition parameters were summarized in the following CTE scanning parameters table.

## Supplementary Material 2: Radiomic feature extraction

A filtering process was performed to implement image smoothing and image differences before CT radiomics feature extraction. Separable filtering was used to avoid multi-dimensional convolution. The convolution was performed with a low-/high-pass “Coiflet 1” wavelet filter along the x- and y-directions, separately. Consider *L* and *H* to be low-pass and high-pass functions, respectively; *X* to be the original CT image; and the filtered results of *X* to be labelled as. Therefore, two new images were obtained by filtering the original image in two directions (x, y).

After filtering, a total of 1288 quantitative features were extracted from the VOI of the original image and its corresponding filtered results, including the features from the categories of histogram, shape, gray-level co-occurrence matrix (GLCM), and gray-level run-length matrix (GLRLM). The process of image filtering and feature extraction was performed using a publicly available software implemented in Python (version 3.7.6). The text box below presents the parameters of PyRadiomics for extracting radiomic features, which can be exported and saved as a YAML-formatted configuration file.

| ### Settings of PyRadiomics ###  imageType:  Original: {} #‘{}’ means that no custom settings were added  LoG:  sigma: [1.0, 2.0, 3.0, 4.0, 5.0]  Wavelet: {}  featureClass:  shape:  firstorder:  glcm:  - 'Autocorrelation'  - 'JointAverage'  - 'ClusterProminence'  - 'ClusterShade'  - 'ClusterTendency'  - 'Contrast'  - 'Correlation'  - 'DifferenceAverage'  - 'DifferenceEntropy'  - 'DifferenceVariance'  - 'JointEnergy'  - 'JointEntropy'  - 'Imc1'  - 'Imc2'  - 'Idm'  - 'Idmn'  - 'Id'  - 'Idn'  - 'InverseVariance'  - 'MaximumProbability'  - 'SumEntropy'  - 'SumSquares'  glrlm:  glszm:  gldm:  setting:  interpolator: 'sitkBSpline'  resampledPixelSpacing: [1, 1, 1]  binWidth: 25  label: 1 # 1forVOI |
| --- |

## Supplementary Material 3: Evaluation of sample size

We calculated the required minimum sample size on MedCalc software based on the expected AUC (area under the receiver operating characteristic curve). The required input and assumption are shown as follows: Type I error – alpha, 0.01; Type II error - beta: 0.2; alternative hypothesis of AUC, 0.800 compared with the null hypothesis of AUC, 0.500; and an allocation ratio of sample sizes in positive / negative groups of 3. The final result showed that a sample size of at least 52 cases (40 negative and 12 positive cases according to response status) was required in both cohorts, indicating that the sample sizes of 207 (140 responders / 67 non-responders) in the training cohort and 89 (60 responders / 29 non-responders) in the test cohort were sufficient with a true AUC > 0.800.

# Supplementary Table

**Supplementary Table 1.** Patient characteristics in training and testing cohorts

| **Characteristics** | **Training cohort,**  **n = 207** | **Testing cohort,**  **n = 89** | ***P* value** |
| --- | --- | --- | --- |
| Outcome |  |  | 0.997 |
| Responders | 140 (68%) | 60 (67%) |  |
| Non-responders | 67 (32%) | 29 (33%) |  |
| Sex, n (%) |  |  | 0.231 |
| Male | 144 (70%) | 68 (76%) |  |
| Female | 63 (30%) | 21 (24%) |  |
| Age **(years)** | 31.58±11.12 | 30.92±10.88 | 0.627 |
| **Disease Duration (years)** | 3.75±3.65 | 4.16±4.23 | 0.696 |
| BMI (kg/m2) | 21.92±3.56 | 19.41±3.87 | 0.557 |
| CRP (mg/L) | 19.08±27.33 | 22.92±38.42 | 0.965 |
| ALB (g/L) | 38.34±6.44 | 38.10±5.14 | 0.914 |
| PLT **(**109/L**)** | 324.22±103.25 | 320.05±101.79 | 0.827 |
| ESR **(**mm/h**)** | 21.61±23.63 | 20.44±20.14 | 0.605 |
| Behavior, n (%) |  |  | 0.627 |
| B1 | 117 (57%) | 45 (51%) |  |
| B2 | 64 (31%) | 32 (36%) |  |
| B3 | 26 (13%) | 12 (13%) |  |
| Location, n (%) |  |  | 0.350 |
| L1 | 46 (22%) | 27 (30%) |  |
| L2 | 12 (5.8%) | 4 (4.5%) |  |
| L3 | 149 (72%) | 58 (65%) |  |
| L4, n (%) |  |  | 0.852 |
| No | 192 (93%) | 82 (92%) |  |
| Yes | 15 (7.2%) | 7 (7.9%) |  |
| Fistula, n (%) |  |  | 0.935 |
| No | 105 (51%) | 46 (52%) |  |
| Simple | 60 (29%) | 24 (27%) |  |
| Complex | 42 (20%) | 19 (21%) |  |
| Bowel Surgery, n (%) |  |  | 0.114 |
| No | 162 (78%) | 62 (70%) |  |
| Yes | 45 (22%) | 27 (30%) |  |
| WBC (109/L) | 7.00±4.89 | 6.39±2.03 | 0.358 |
| RBC (1012/L) | 4.46±0.72 | 4.64±0.67 | 0.068 |
| Hb (g/L) | 119.19±25.38 | 122.42±21.36 | 0.553 |
| HCT (**L**/L) | 0.57±2.82 | 0.83±3.81 | 0.103 |
| Smoking History, n (%) |  |  | 0.340 |
| No | 175 (85%) | 79 (89%) |  |
| Yes | 32 (15%) | 10 (11%) |  |
| ASA Treatment History, n (%) |  |  | 0.661 |
| No | 80 (39%) | 32 (36%) |  |
| Yes | 127 (61%) | 57 (64%) |  |
| Steroid Treatment History, n (%) |  |  | 0.761 |
| No | 117 (57%) | 52 (58%) |  |
| Yes | 90 (43%) | 37 (42%) |  |
| Immunosuppressive Treatment History, n (%) |  |  | 0.063 |
| No | 89 (43%) | 28 (31%) |  |
| Yes | 118 (57%) | 61 (69%) |  |
| Prior Biologics Treatment, n (%) |  |  | 0.919 |
| No | 89 (43%) | 41 (46%) |  |
| anti -TNF | 81 (39%) | 31 (35%) |  |
| VDZ | 18 (8.7%) | 8 (9.0%) |  |
| anti-TNF + VDZ | 19 (9.2%) | 9 (10%) |  |
| Limberg Degree, n (%) |  |  | 0.905 |
| 1 | 1 (0.5%) | 1 (1.1%) |  |
| 2 | 19 (9.2%) | 7 (7.9%) |  |
| 3 | 140 (68%) | 61 (69%) |  |
| 4 | 47 (23%) | 20 (22%) |  |
| CDAI | 265±72 | 272±82 | 0.665 |
| SES-CD | 16 ±5 | 19±9 | 0.235 |
| Abbreviations: BMI, Body Mass Index; CRP, C-reactive Protein; ALB, Albumin; PLT, Platelet Count; ESR, Erythrocyte Sedimentation Rate; WBC, White Blood Cell; RBC, Red Blood Cell; Hb, Hemoglobin; HCT, Hematocrit; ASA, Aminosalicylic Acid; anti-TNF, anti-Tumor Necrosis Factor; VDZ, Vedolizumab; CDAI, Crohn’s Disease Activity Index; SES-C, Simple Endoscopic Score for Crohn Disease. | | | |
|  | | | |

**Supplementary Table 2.** CTE scanning parameters

| CTE Scanning Parameters | Aquilion One  （Canon Medical System） | Discovery CT 750  （GE HealthCare） |
| --- | --- | --- |
| Tube Voltage (kVp) | 120 | 120 |
| Tube Current (mA) | Smart | Smart |
| Pitch | 8.13 | 8.13 |
| Slice Thickness (mm) | 1 | 1 |
| Slice Interval (mm) | 1 | 1 |
| Contrast Agent | Ultravist 370 | Ultravist 370 |

Abbreviations: CTE, Computed Tomography Enterography.

**Supplementary Table 3.** Coefficient of selected features

| **Features** | **Coefficient** | **Feature Interpretation** |
| --- | --- | --- |
| (Intercept) | 0.784689 |  |
| log.sigma.1.0.mm.3D_glszm_LargeAreaEmphasis | -0.4809 | A measure of distribution of large area size zones, with a greater value indicative of more larger size zones and more coarse textures. |
| log.sigma.1.0.mm.3D_ngtdm_Strength | 0.786973 | A measure of the primitives in an image. Its value is high when the primitives are easily defined and visible. |
| log.sigma.2.0.mm.3D_firstorder_Kurtosis | -0.59438 | A measure of the ‘peakedness’ of the distribution of values in the image ROI. A higher kurtosis implies that the mass of the distribution is concentrated towards the tail(s) rather than towards the mean. A lower kurtosis implies the reverse: that the mass of the distribution is concentrated towards a spike near the Mean value. |
| log.sigma.2.0.mm.3D_ngtdm_Busyness | -0.25824 | A measure of the change from a pixel to its neighbour. A high value for busyness indicates a ‘busy’ image, with rapid changes of intensity between pixels and its neighbourhood. |
| log.sigma.3.0.mm.3D_glcm_JointEnergy | 0.692101 | A measure of homogeneous patterns in the image. A greater Energy implies that there are more instances of intensity value pairs in the image that neighbor each other at higher frequencies. |
| log.sigma.5.0.mm.3D_glcm_ClusterProminence | -0.02105 | A measure of the skewness and asymmetry of the GLCM. A higher value implies more asymmetry about the mean while a lower value indicates a peak near the mean value and less variation about the mean. |
| log.sigma.5.0.mm.3D_ngtdm_Busyness | -0.24017 | A measure of the change from a pixel to its neighbour. A high value for busyness indicates a ‘busy’ image, with rapid changes of intensity between pixels and its neighbourhood. |
| original_glcm_ClusterShade | 0.754404 | A measure of the skewness and uniformity of the GLCM. A higher cluster shade implies greater asymmetry about the mean. |
| original_gldm_LargeDependenceHighGrayLevelEmphasis | -0.13642 | Measures the joint distribution of large dependence with higher gray-level values. |
| original_glszm_GrayLevelVariance | -0.04461 | Measures the variance in gray level intensities for the zones. |
| original_ngtdm_Busyness | -0.36931 | A measure of the change from a pixel to its neighbour. A high value for busyness indicates a ‘busy’ image, with rapid changes of intensity between pixels and its neighbourhood. |
| original_shape_Maximum2DDiameterRow | 0.427669 | Defined as the largest pairwise Euclidean distance between tumor surface mesh vertices in the column-slice (usually the sagittal) plane. |
| wavelet.HHH_glcm_Imc1 | 0.380733 | Assesses the correlation between the probability distributions of i and j (quantifying the complexity of the texture) |
| wavelet.LHH_gldm_SmallDependenceHighGrayLevelEmphasis | 0.238562 | Measures the joint distribution of small dependence with higher gray-level values. |
| wavelet.LHH_glszm_LargeAreaHighGrayLevelEmphasis | 0.277202 | Measures the proportion in the image of the joint distribution of larger size zones with higher gray-level values. |
| wavelet.LLL_firstorder_Kurtosis | -0.55618 | A measure of the ‘peakedness’ of the distribution of values in the image ROI. A higher kurtosis implies that the mass of the distribution is concentrated towards the tail(s) rather than towards the mean. A lower kurtosis implies the reverse: that the mass of the distribution is concentrated towards a spike near the Mean value. |

# Supplementary Figure

**Supplementary Figure. A and B** illustrate the application of LASSO logistic regression on features derived from the inflamed intestinal segments. LASSO regression is capable of dimensionality reduction by shrinking the coefficients of certain features to zero, thereby enabling the selection of key features. In **Figure A**, the binomial deviance metrics (plotted on the y-axis) are graphed against log(λ) (the lower x-axis). The top x-axis in both **Figure A and Figure C** indicates the number of variables corresponding to the specified log(λ). In **Figure B**, red dots denote the average binomial deviance for each model at the given λ. The LASSO coefficient profiles are depicted for the retained radiomic features. The vertical black line signifies the optimal λ, at which the model achieves the best fit to the data. **Figure C** presents the pairwise Pearson correlation coefficients among the 16 selected radiomic features from the inflamed intestine segments. The correlation among the selected features is less than 0.9, suggesting independence among the features.


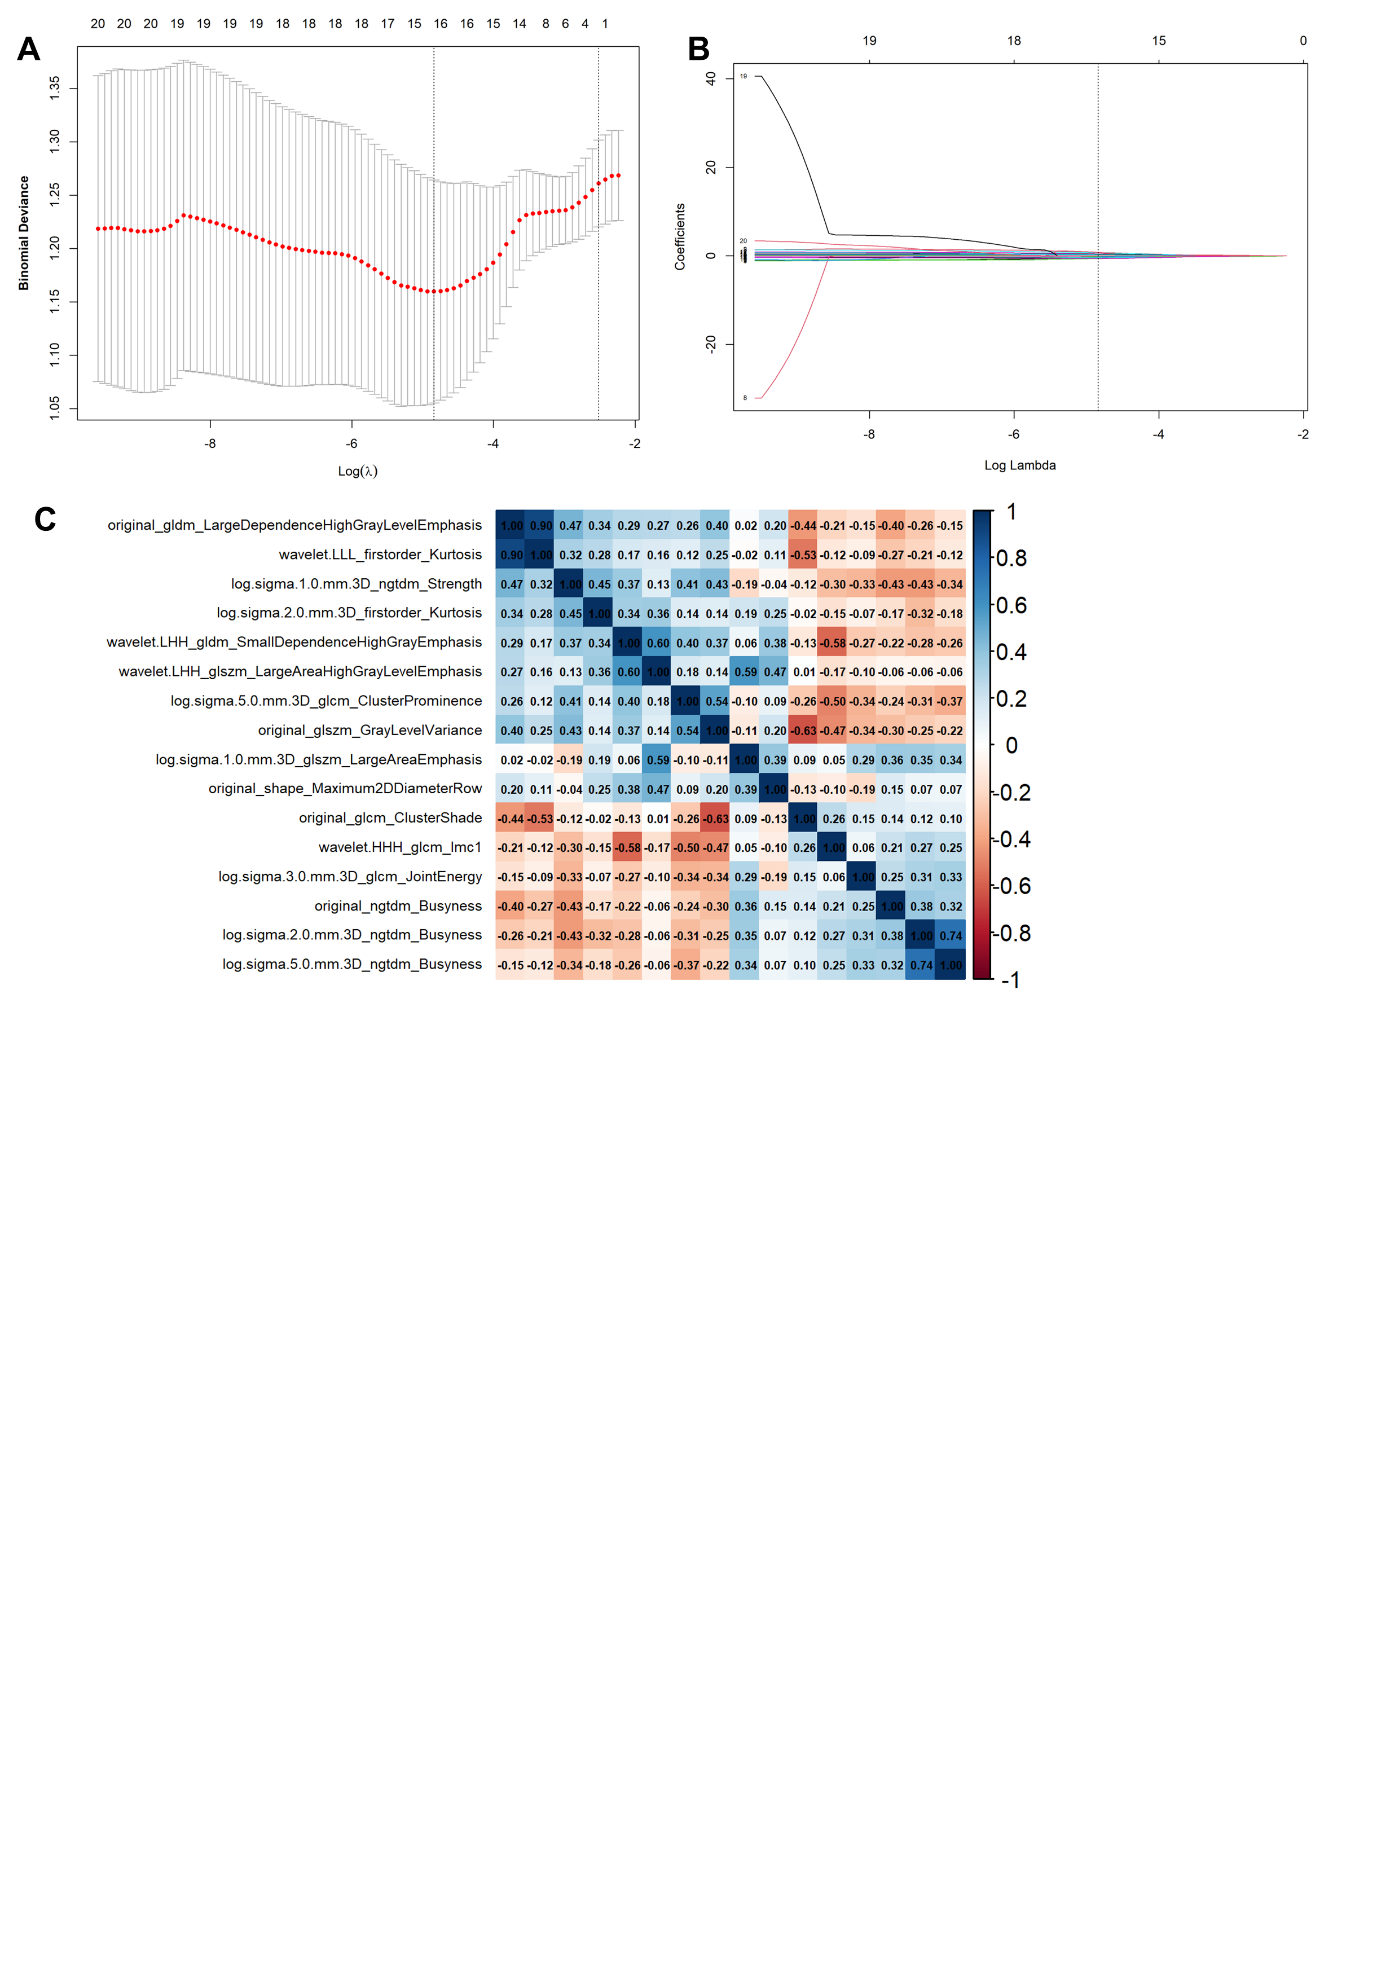

Supplement: Supplementary file 1 [file 47be4a0f9d60492416758048.docx]
